# Supplementary material for: Mechanochemical effect on the electrochemical properties of a Na3(VO)2(PO4)2F positive electrode for sodium-ion batteries
Source: Royal Society of Chemistry journal article supplement (doi:10.1039/d4ma00106k), 2024-01-01
Supplement: d4ma00106k1.pdf [file d4ma00106k1.pdf]

Supporting Information

# Mechanochemical Effect on the Electrochemical Properties of $\text{Na}_3(\text{VO})_2(\text{PO}_4)_2\text{F}$ Positive Electrode for Sodium-Ion Batteries

William G. Morais<sup>a\*</sup>, Eduardo C Melo, and Roberto M. Torresi\*

*Departamento de Química Fundamental, Instituto de Química, Universidade de São Paulo, Av.  
Prof. Lineu Prestes, 748, 05508-000, São Paulo, SP, Brazil.*

<sup>a</sup> Present address: Center for Sustainable Energy – SE, Fondazione Bruno Kessler – FBK. Via  
Sommarive 18, 38123 Povo (TN), Italy

E-mail: rtorresi@iq.usp.br (RMT), wgomesdemorais@fbk.eu (WGM).

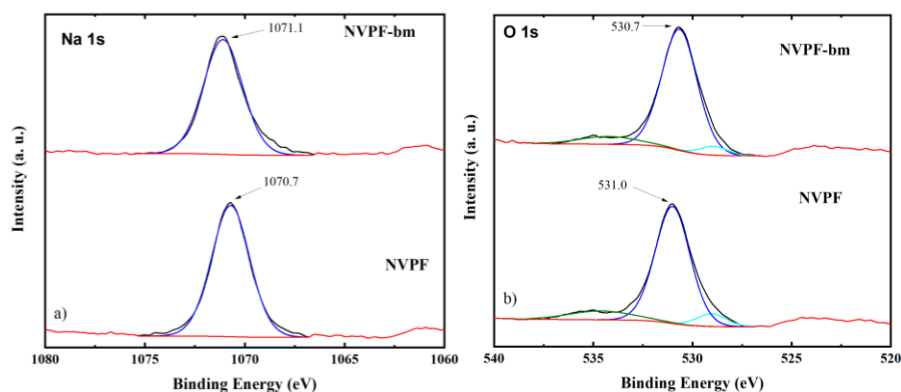

Figure S1: XPS spectra and corresponding deconvolution results of the orbital peak a) Na 1s and b) O 1s of the NVPF and NVPF-bm electrodes.

The obtained  $dQ/dE$  plots were fitted with the aid of the software Origin, version 2020, OriginLab Corporation. The area of each peak was normalized by the total area of the full charge (or discharge) curve. Figures S1 and S2 show the fitted plots for the NVPF and NVPF-bm, respectively.

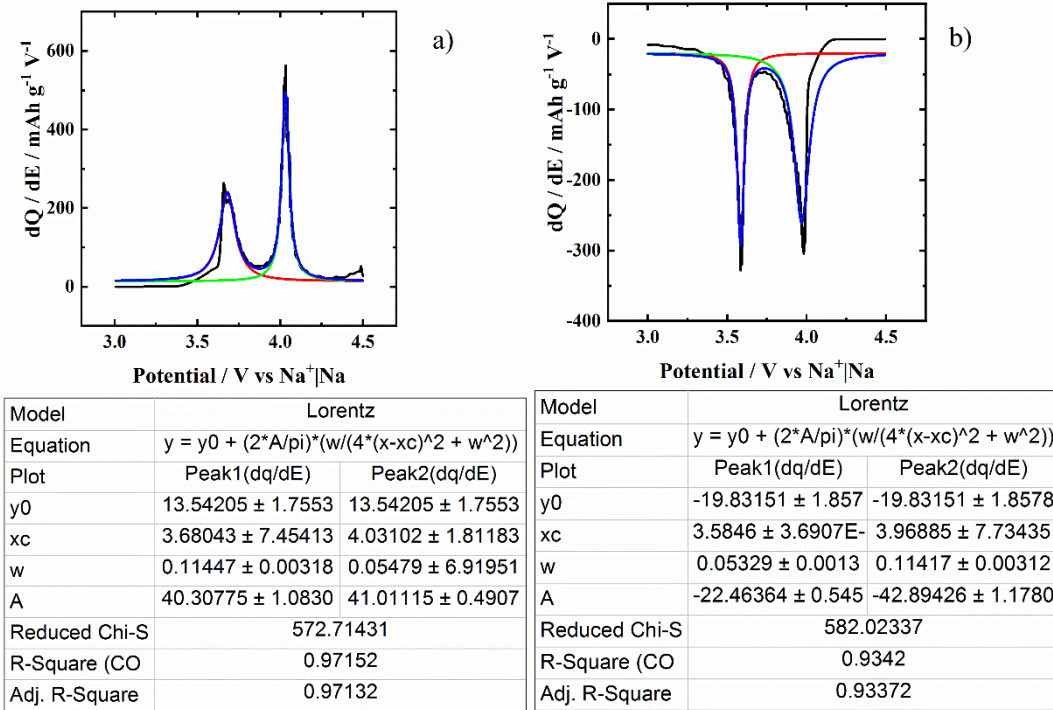

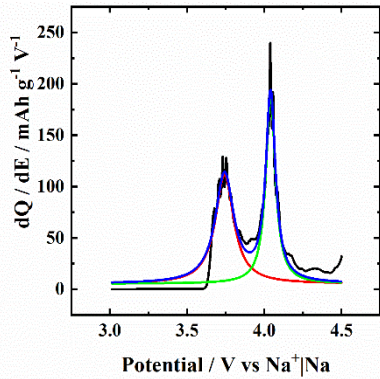

c)

| Model          | Lorentz                                                               |                        |
|----------------|-----------------------------------------------------------------------|------------------------|
| Equation       | $y = y_0 + (2 \cdot A / \pi) \cdot (w / (4 \cdot (x - x_c)^2 + w^2))$ |                        |
| Plot           | Peak1(dq/dE)                                                          | Peak2(dq/dE)           |
| y0             | $5.38082 \pm 1.2929$                                                  | $5.38082 \pm 1.29299$  |
| xc             | $3.74202 \pm 0.0015$                                                  | $4.04052 \pm 5.20794E$ |
| w              | $0.14426 \pm 0.0062$                                                  | $0.07532 \pm 0.00191$  |
| A              | $24.06491 \pm 0.989$                                                  | $21.65575 \pm 0.50557$ |
| Reduced Chi-S  | 137.24737                                                             |                        |
| R-Square (COD) | 0.95936                                                               |                        |
| Adj. R-Square  | 0.95865                                                               |                        |

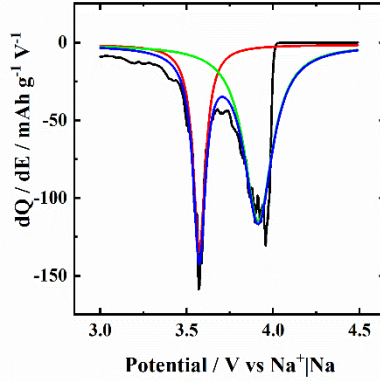

d)

| Model         | Lorentz                                                               |                       |
|---------------|-----------------------------------------------------------------------|-----------------------|
| Equation      | $y = y_0 + (2 \cdot A / \pi) \cdot (w / (4 \cdot (x - x_c)^2 + w^2))$ |                       |
| Plot          | Peak1(dq/dE)                                                          | Peak2(dq/dE)          |
| y0            | $-1.44403 \pm 1.64952$                                                | $-1.44403 \pm 1.6495$ |
| xc            | $3.57307 \pm 9.92905$                                                 | $3.91364 \pm 0.00202$ |
| w             | $0.08521 \pm 0.00363$                                                 | $0.19891 \pm 0.00875$ |
| A             | $-17.71965 \pm 0.6963$                                                | $-35.43546 \pm 1.583$ |
| Reduced Chi-S | 168.89527                                                             |                       |
| R-Square (CO) | 0.92057                                                               |                       |
| Adj. R-Square | 0.91915                                                               |                       |

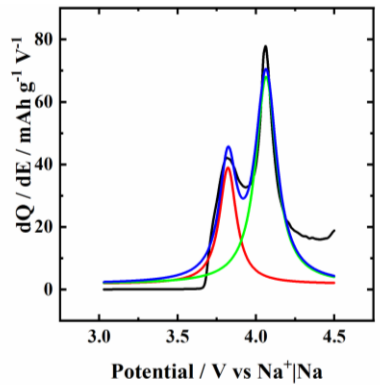

e)

| Model           | Lorentz                                                               |                       |
|-----------------|-----------------------------------------------------------------------|-----------------------|
| Equation        | $y = y_0 + (2 \cdot A / \pi) \cdot (w / (4 \cdot (x - x_c)^2 + w^2))$ |                       |
| Plot            | Peak1(dq/dE)                                                          | Peak2(dq/dE)          |
| y0              | $1.75908 \pm 0.7587$                                                  | $1.75908 \pm 0.75876$ |
| xc              | $3.82111 \pm 0.0048$                                                  | $4.06461 \pm 0.00292$ |
| w               | $0.13098 \pm 0.0164$                                                  | $0.16334 \pm 0.00983$ |
| A               | $7.65513 \pm 0.8197$                                                  | $17.00534 \pm 0.9435$ |
| Reduced Chi-Sqr | 34.84459                                                              |                       |
| R-Square (COD)  | 0.92526                                                               |                       |
| Adj. R-Square   | 0.92216                                                               |                       |

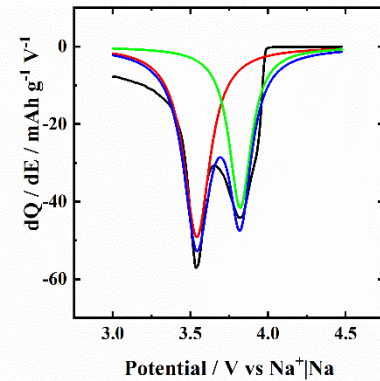

f)

| Model          | Lorentz                                                               |                       |
|----------------|-----------------------------------------------------------------------|-----------------------|
| Equation       | $y = y_0 + (2 \cdot A / \pi) \cdot (w / (4 \cdot (x - x_c)^2 + w^2))$ |                       |
| Plot           | Peak1(dq/dE)                                                          | Peak2(dq/dE)          |
| y0             | $-0.05956 \pm 0.6526$                                                 | $-0.05956 \pm 0.6526$ |
| xc             | $3.54101 \pm 0.00369$                                                 | $3.8206 \pm 0.00395$  |
| w              | $0.20622 \pm 0.01259$                                                 | $0.17269 \pm 0.01357$ |
| A              | $-15.90193 \pm 0.918$                                                 | $-11.26327 \pm 0.805$ |
| Reduced Chi-S  | 19.72584                                                              |                       |
| R-Square (COD) | 0.93746                                                               |                       |
| Adj. R-Square  | 0.93486                                                               |                       |

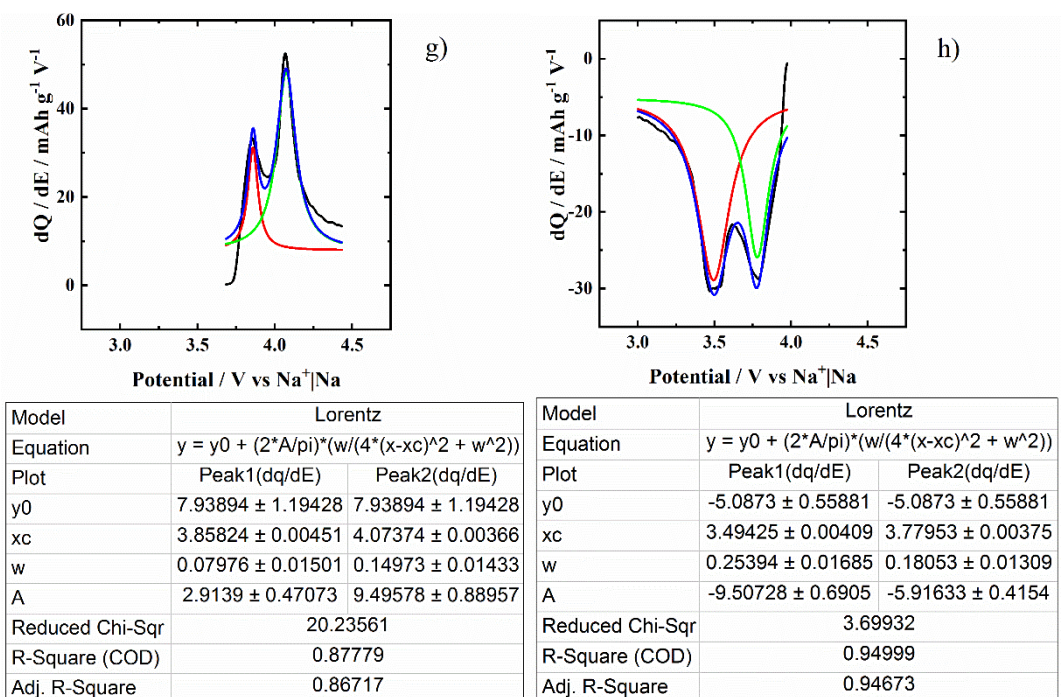

Figure S2: Fitting of the dQ/dE peaks of the NVPF electrode at (a, b) 10, (c, d) 20, (e, f) 50 and (g, h) 70  $\mu\text{A g}^{-1}$ .

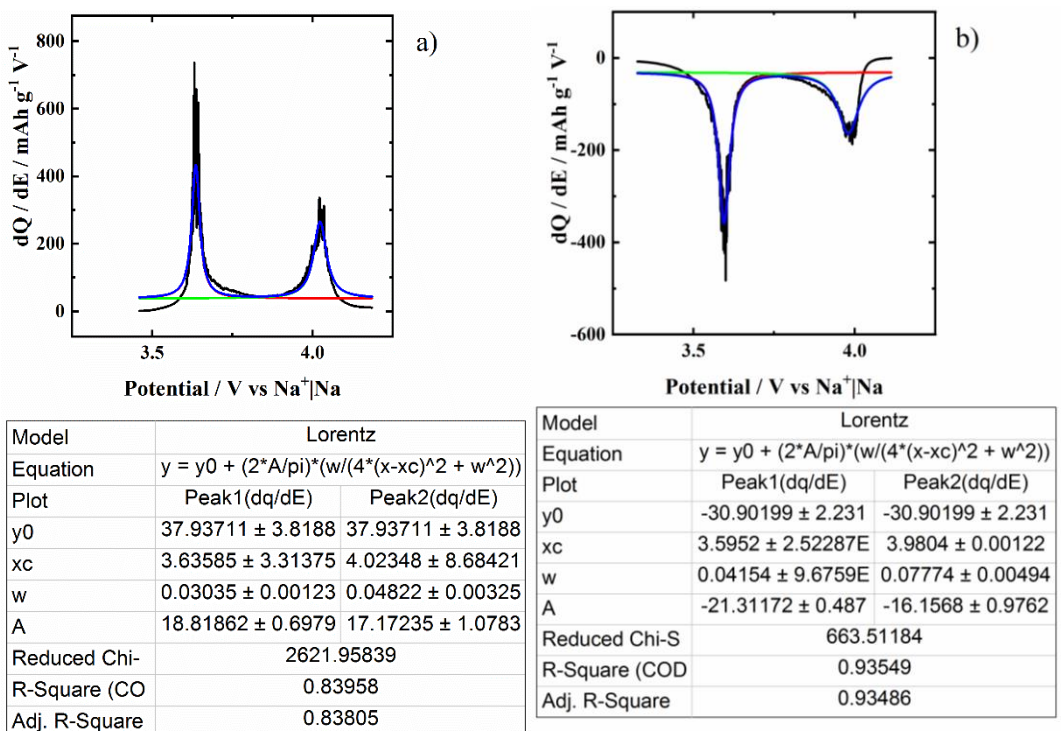

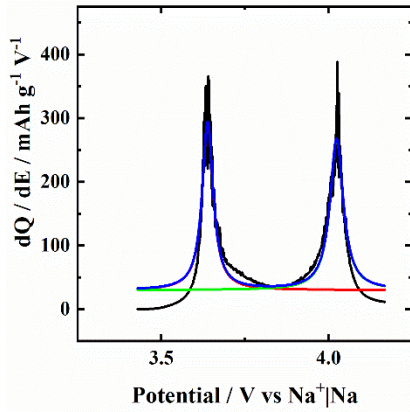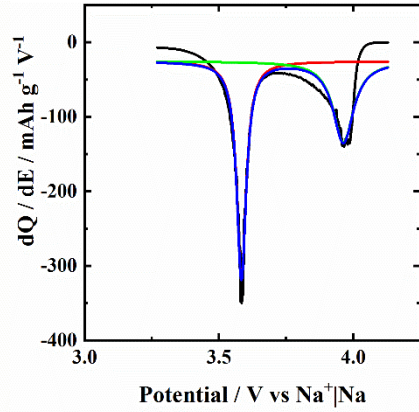

| Model         | Lorentz                                      |                       |
|---------------|----------------------------------------------|-----------------------|
| Equation      | $y = y_0 + (2*A/\pi)*(w/(4*(x-xc)^2 + w^2))$ |                       |
| Plot          | Peak1(dq/dE)                                 | Peak2(dq/dE)          |
| y0            | $30.08333 \pm 2.2481$                        | $30.08333 \pm 2.2481$ |
| xc            | $3.63873 \pm 3.39761$                        | $4.02455 \pm 4.37333$ |
| w             | $0.03942 \pm 0.00132$                        | $0.0481 \pm 0.00168$  |
| A             | $16.31804 \pm 0.5076$                        | $17.87592 \pm 0.5967$ |
| Reduced Chi-  | 713.203                                      |                       |
| R-Square (CO  | 0.91629                                      |                       |
| Adj. R-Square | 0.91541                                      |                       |

| Model         | Lorentz                                      |                       |
|---------------|----------------------------------------------|-----------------------|
| Equation      | $y = y_0 + (2*A/\pi)*(w/(4*(x-xc)^2 + w^2))$ |                       |
| Plot          | Peak1(dq/dE)                                 | Peak2(dq/dE)          |
| y0            | $-25.57376 \pm 2.0402$                       | $-25.57376 \pm 2.040$ |
| xc            | $3.58368 \pm 2.66315$                        | $3.96322 \pm 0.0016$  |
| w             | $0.04275 \pm 0.00103$                        | $0.09227 \pm 0.0064$  |
| A             | $-19.60521 \pm 0.4577$                       | $-15.78914 \pm 1.057$ |
| Reduced Chi-S | 270.89365                                    |                       |
| R-Square (CO  | 0.96657                                      |                       |
| Adj. R-Square | 0.9659                                       |                       |

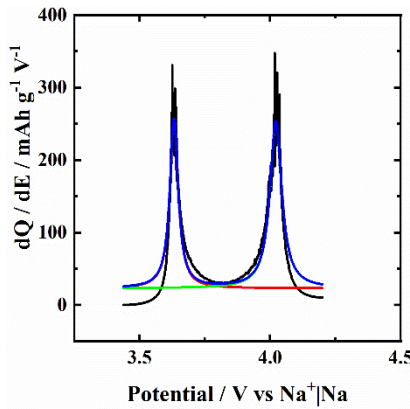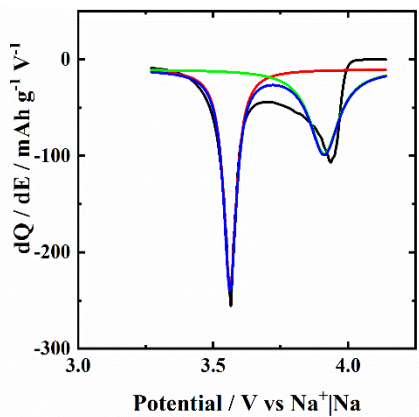

| Model         | Lorentz                                      |                       |
|---------------|----------------------------------------------|-----------------------|
| Equation      | $y = y_0 + (2*A/\pi)*(w/(4*(x-xc)^2 + w^2))$ |                       |
| Plot          | Peak1(dq/dE)                                 | Peak2(dq/dE)          |
| y0            | $22.91637 \pm 2.1776$                        | $22.91637 \pm 2.1776$ |
| xc            | $3.63202 \pm 3.62022$                        | $4.02206 \pm 4.41271$ |
| w             | $0.03872 \pm 0.00141$                        | $0.05443 \pm 0.00175$ |
| A             | $14.20209 \pm 0.4816$                        | $19.68405 \pm 0.6243$ |
| Reduced Chi-  | 566.8149                                     |                       |
| R-Square (CO  | 0.92274                                      |                       |
| Adj. R-Square | 0.92184                                      |                       |

| Model         | Lorentz                                      |                       |
|---------------|----------------------------------------------|-----------------------|
| Equation      | $y = y_0 + (2*A/\pi)*(w/(4*(x-xc)^2 + w^2))$ |                       |
| Plot          | Peak1(dq/dE)                                 | Peak2(dq/dE)          |
| y0            | $-10.07979 \pm 2.9127$                       | $-10.07979 \pm 2.912$ |
| xc            | $3.56251 \pm 6.32714$                        | $3.91167 \pm 0.0036$  |
| w             | $0.05736 \pm 0.00243$                        | $0.13111 \pm 0.0145$  |
| A             | $-20.4024 \pm 0.83285$                       | $-18.02952 \pm 1.985$ |
| Reduced Chi-S | 202.77533                                    |                       |
| R-Square (CO  | 0.95911                                      |                       |
| Adj. R-Square | 0.95715                                      |                       |

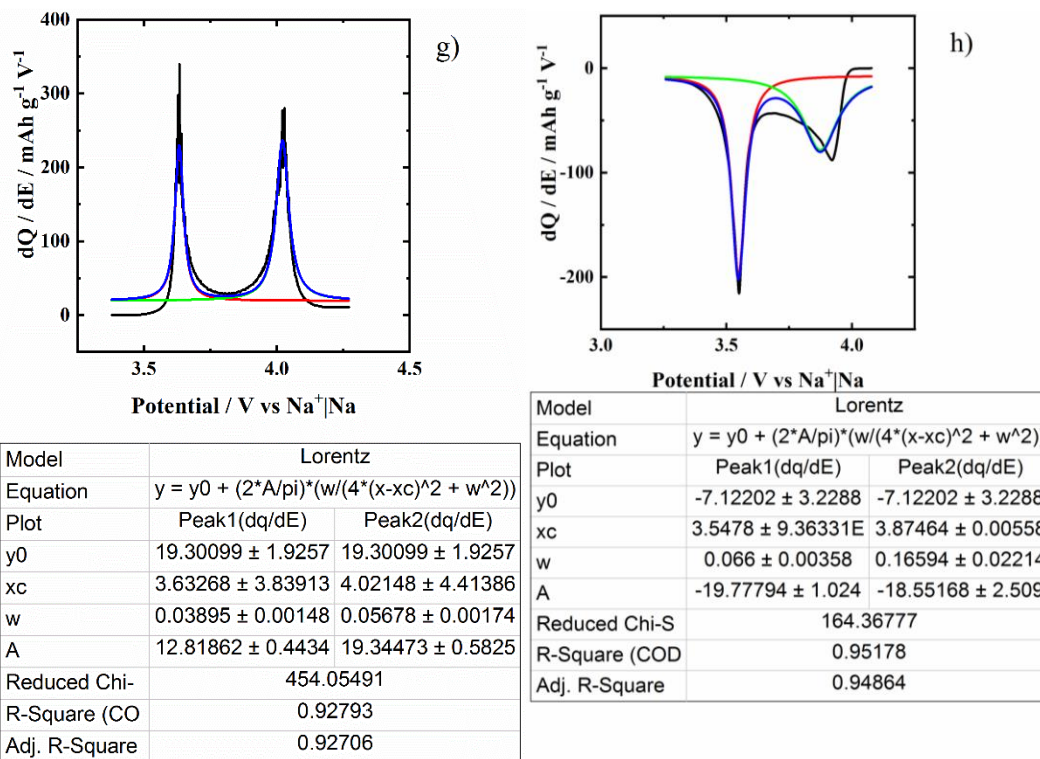

Figure S3: Fitting of the dQ/dE peaks of the NVPF-bm electrode at (a, b) 10, (c, d) 20, (e, f) 50 and (g, h) 70  $\mu\text{A g}^{-1}$ .

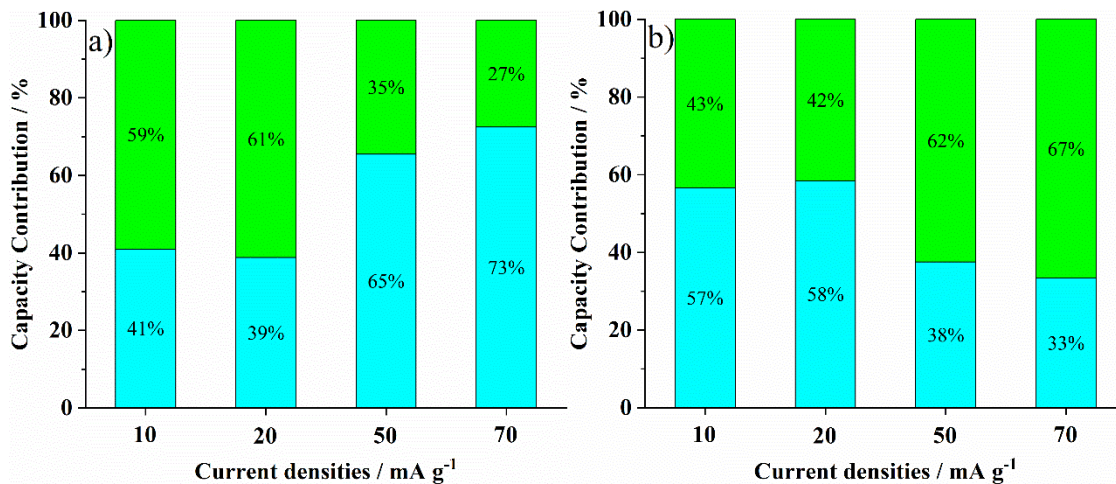

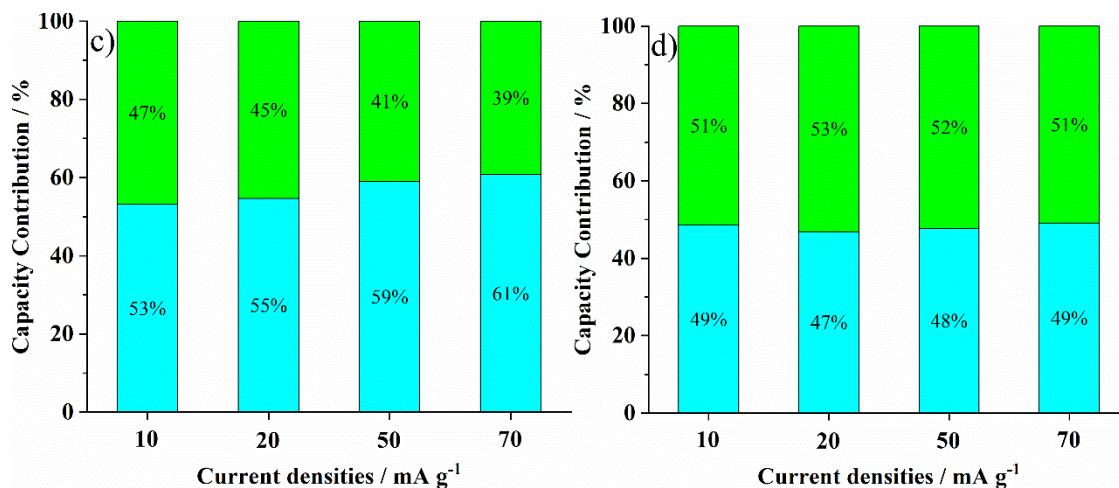

Figure S4: Capacity contributions from the (a, b)  $\text{Na}_1^+$  and (c, d)  $\text{Na}_2^+$  for the (light green) charge and (light blue) discharge processes of the (a, b) NVPF and (c, d) NVPF-bm electrodes.

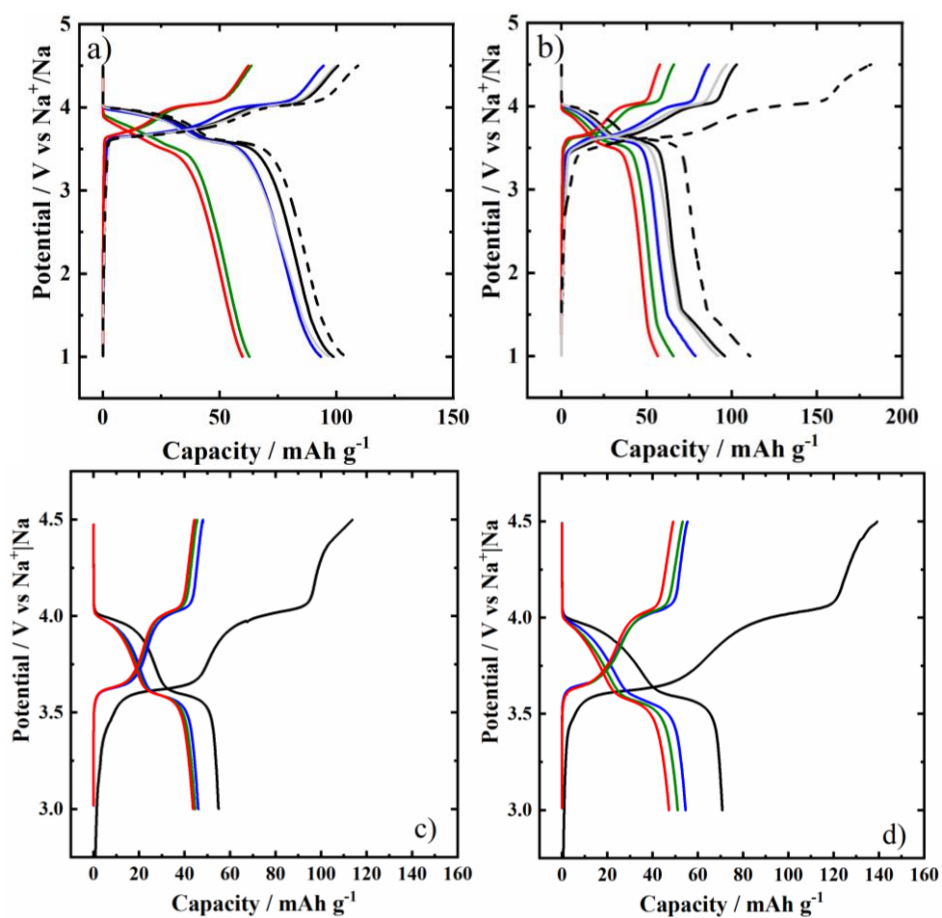

Figure S5: Charge and discharge curves NVPF (a) and NVPF-bm (b) electrodes at 0.01 (—), 0.02 (—), 0.05 (—) and 0.07 (—)  $A g^{-1}$ , with the 1<sup>st</sup> (—) and 100<sup>th</sup> (—) cycle at 0.01  $A g^{-1}$ . 1<sup>st</sup> (—), 50<sup>th</sup> (—), 100<sup>th</sup> (—) and 150<sup>th</sup> (—) cycle of charge/discharge of the NVPF (c) and NVPF-bm (d) electrodes charged at 0.01, discharged at 0.02  $A g^{-1}$ .

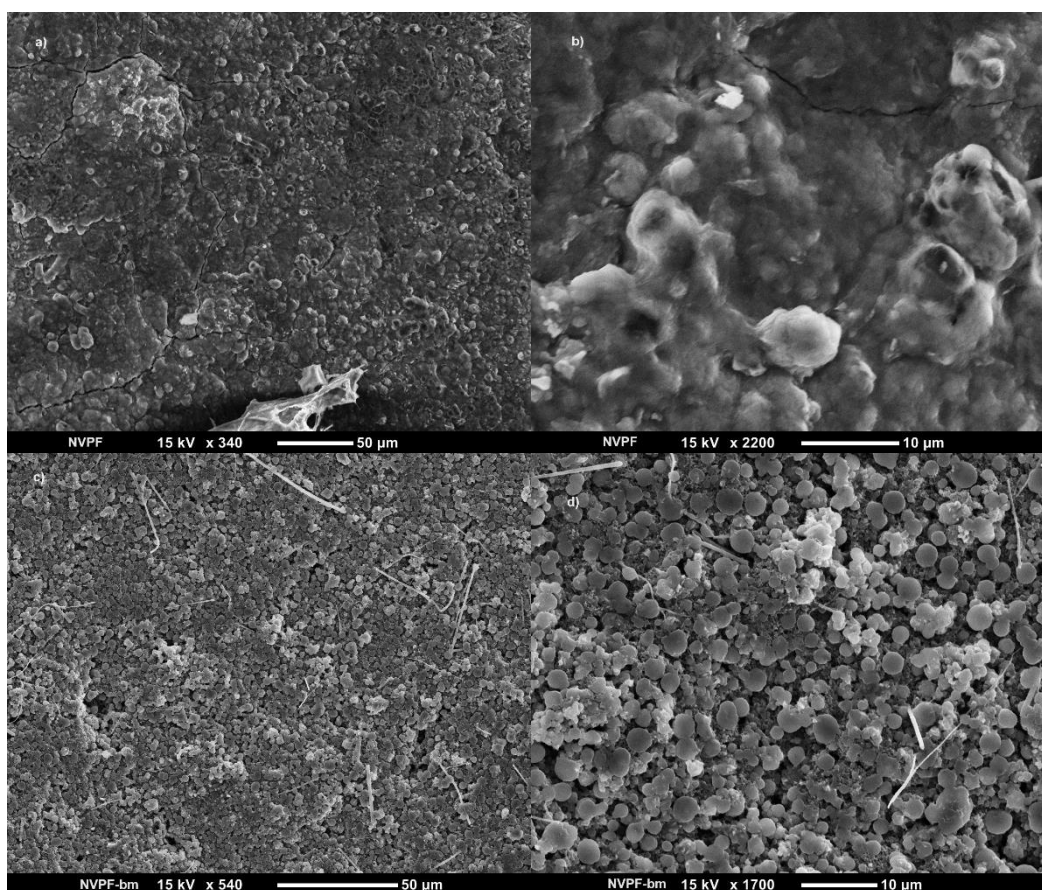

Figure S6: Post-mortem SEM images of the NVPF (a, b) and NVPF-bm (c, d) electrodes.



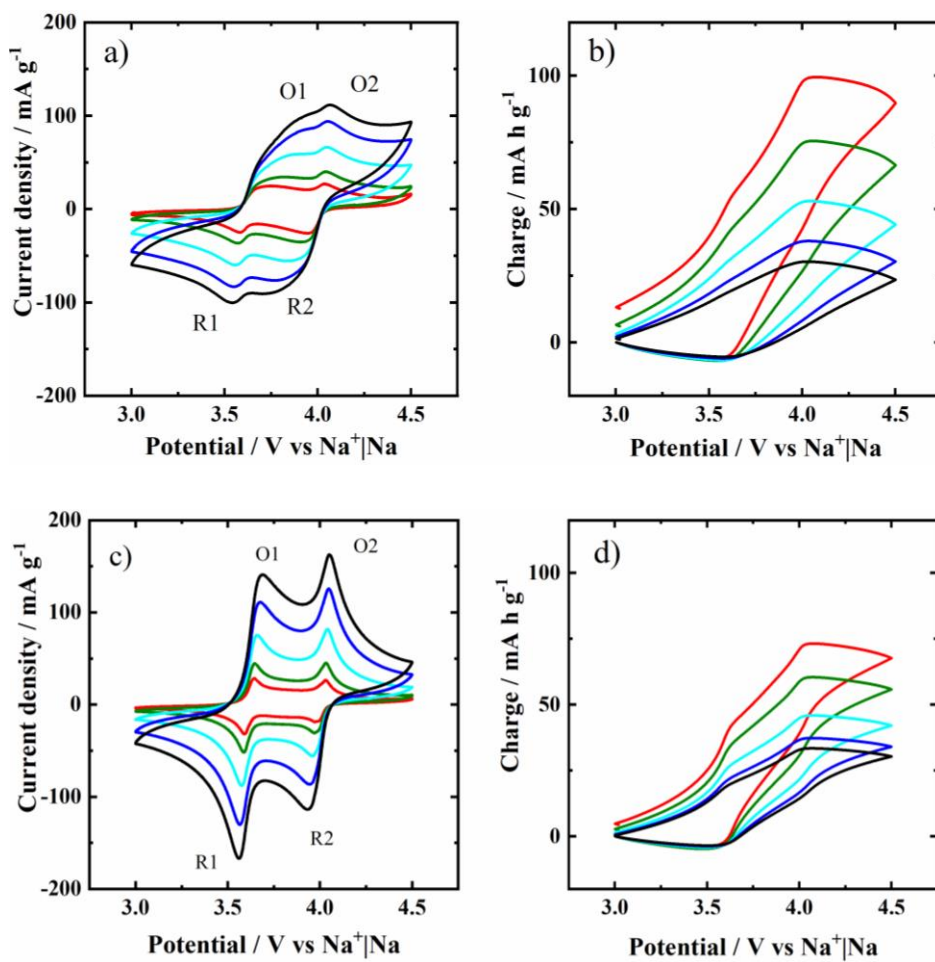

Figure S7: Cyclic voltammograms and charge variation as a function of the cell potential of the NVPF (a, b) and NVPF-bm (c, d).  $v = 0.05$  (—),  $0.10$  (—),  $0.25$  (—),  $0.50$  (—) and  $0.75$  mV s<sup>-1</sup>
